# Supplementary material
Source: bioRxiv or medRxiv preprint supplement (https://medrxiv.org/highwire/filestream/75562/field_highwire_adjunct_files/0/2020.04.03.20052936-1.pdf)
Supplement: Supplementary file [file 2020.04.03.20052936-1.pdf]

**Appendix Section A: Keywords used to identify Infection Control categories**

| Category     | Keywords                                                                                                                                                                                                                                                                                                                                                   |
|--------------|------------------------------------------------------------------------------------------------------------------------------------------------------------------------------------------------------------------------------------------------------------------------------------------------------------------------------------------------------------|
| Hand Hygiene | disinfect<br>clean wipes<br>cleaning wipes<br>handhygiene<br>hand hygiene<br>handsanitizer<br>hand sanitizer<br>handwashing<br>handwash<br>hand wash<br>washhands<br>wash hands<br>wash<br>washes<br>washing                                                                                                                                               |
| Isolation    | airborne<br>airborneisolation<br>airborne isolation<br>airborneprecautions<br>airborne precautions<br>contactisolation<br>contact isolation<br>contactprecautions<br>contact precautions<br>dropletisolation<br>droplet isolation<br>dropletprecautions<br>droplet precautions<br>isolation<br>isolationprecautions<br>isolation precautions<br>quarantine |
| Mask         | facemask<br>face mask<br>mask<br>n95<br>p2<br>respirator<br>surgicalmask<br>surgical mask                                                                                                                                                                                                                                                                  |

|                                                                                               |                                                                                                                                                                                                                                                                                                                      |
|-----------------------------------------------------------------------------------------------|----------------------------------------------------------------------------------------------------------------------------------------------------------------------------------------------------------------------------------------------------------------------------------------------------------------------|
| Vaccination                                                                                   | immunize<br>immunized<br>immunization<br>flushot<br>flu shot<br>vaccine<br>vaccines<br>vaccinate<br>vaccinated<br>vaccination<br>vaccinations                                                                                                                                                                        |
| Racism [based on keywords noted in this New York Times article [1] and collected inductively] | bioterror<br>bioterrorists<br>bioterrorism<br>chinaviruspandamonium<br>chineseredbull<br>chinese redbull<br>chinesedontcometojapan<br>dirty<br>fortunecookie<br>fortune cookie<br>fortunecookies<br>fortune cookies<br>insensitive<br>redbull<br>red bull<br>xenophobia<br>xenophobic<br>yellowalert<br>yellow alert |

## Appendix Section B:

Appendix Table 1: Basic characteristics of tweet metadata stratified before and after January 21, 2020, the date which the CDC activation its Emergency Operations Center and the WHO released its first situation report. Continuous variables are presented as mean (standard deviation) and categorical variables as number (%).

|                  | All<br>n = 126,049 | Before<br>January 21, 2020<br>n = 3,824 (3.2%) | On or After<br>January 21, 2020<br>n = 122,225<br>(96.7%) |
|------------------|--------------------|------------------------------------------------|-----------------------------------------------------------|
| <b>Has Media</b> | 25,642 (20.3)      | 832 (21.7)                                     | 24,810 (20.3)                                             |
| <b>Has Links</b> | 69,811 (55.4)      | 2,711 (70.9)                                   | 67,100 (54.9)                                             |
| <b>Has Reply</b> | 33,600 (26.7)      | 936 (24.5)                                     | 32,664 (26.7)                                             |
| <b>Is Reply</b>  | 13,937 (11.1)      | 200 (5.2)                                      | 13,737 (11.2)                                             |
| <b>Hashtags</b>  | 2.7 (2.5)          | 3.1 (2.9)                                      | 2.7 (2.5)                                                 |
| <b>Likes</b>     | 13.3 (457.3)       | 15.1 (339.8)                                   | 13.3 (460.5)                                              |
| <b>Replies</b>   | 0.9 (7.8)          | 0.7 (7.1)                                      | 0.9 (7.9)                                                 |
| <b>Retweets</b>  | 9.9 (612.7)        | 8.9 (187.0)                                    | 9.9 (621.3)                                               |

## Appendix Figure 1: More narrative tweets of different emotions and misinformation.

Fear ! Fear ! Fear !Fear ! Fear ! Fear !Fear ! Fear ! Fear !  
!Fear ! Fear ! Fear !Fear ! Fear ! Fear !Fear ! Fear ! Fear !  
!Fear ! Fear ! Fear !Fear ! Fear ! Fear !Fear ! Fear ! Fear !  
!Fear ! Fear ! Fear !Fear ! Fear ! Fear !Fear ! Fear ! Fear !  
!Fear ! Fear #CoronaVirus

11:21 AM · Jan 24, 2020 · TweetDeck

#CHINAVIRUS #AGENDA21 #CORONAVIRUS  
#BREAKINGNEWS HOW SARS AND CORONAVIRUS ARE  
BIOWEAPONS 4 "VACCINE BIG BUSINESS". READ  
BEFORE THEY CENSOR THIS!!!  
[blog.nomorefakenews.com/2020/01/22/is-...](http://blog.nomorefakenews.com/2020/01/22/is-...)

6:36 PM · Jan 23, 2020 · Twitter Web App

This generosity at a critical time in the #coronavirus  
outbreak is so good to see. Thank you @billgates,  
@melindagates, @gatesfoundation

Coronavirus is manmade, and was there already in the  
1950's.

Nowadays only modified. Again used upon the people.  
Mainly to spread fear and used for the vaccination-  
campaigns through mainstream media. #coronavirus  
#manmade #fear #pandamonium #MSM #MSMLies  
#antivax #truth #WakeUp

4:05 AM · Jan 25, 2020 · Twitter for Android

Transparency. Contained. Sure it is. #coronavirus  
#SoAngry

8:27 PM · Jan 24, 2020 · Twitter Web App

Here's a headline I wasn't expecting. In related news: I  
predict a reduction in sales of #snakes for human food  
consumption. #coronavirus

## **References**

1. Motoko Rich. As Coronavirus Spreads, So Does Anti-Chinese Sentiment. New York Times. 2020; Available at: <https://www.nytimes.com/2020/01/30/world/asia/coronavirus-chinese-racism.html>. Accessed 5 February 2020.
